# Supplementary material for: Procalcitonin and Risk Prediction for Diagnosing Bacteremia in Hospitalized Patients: A Retrospective, National Observational Study
Source: MDPI journal article supplement (doi:10.3390/diagnostics13203174), 2023-10-11
Supplement: s1 [file s1]

## Supplemental Materials

**Table S1.** Admitting or present on admission diagnoses from ICD-10 Codes

| Variable       | Codes                                                                                                                                                                                                                                                                                                                                                                                                                                                                                                                                           |
|----------------|-------------------------------------------------------------------------------------------------------------------------------------------------------------------------------------------------------------------------------------------------------------------------------------------------------------------------------------------------------------------------------------------------------------------------------------------------------------------------------------------------------------------------------------------------|
| Pneumonia      | 481, 481, 482.2, 482.30, 482.31, 482.32, 482.39, 482.84, 482.9, 483.0, 483.1, 483.8, 485, 486, J13, J18.0, J18.1, J18.8, J18.9, J15.0, J15.3, J15.4, J15.5, J15.6, J15.7, J15.8, J15.9, J16.0, J16.8, J14, 480, 480.1, 480.2, 480.3, 480.8, 480.9, 482.4, 482.41, 482.42, 482.49, 482.81, 482.82, 482.83, 482.89, 483, 484.3, 484.5, 484.6, 484.7, 484.8, 487, 488.01, 488.11, 488.81, J10.00, J10.01, J10.08, J11.0, J11.00, J11.08, J12.0, J12.1, J12.2, J12.3, J12.8, J12.81, J12.89, J15.1, J15.20, J15.21, J15.211, J15.212, J15.29, J69.0 |
| Fever          | R50, R50.2, R50.8, R50.81, R50.82, R50.83, R50.9                                                                                                                                                                                                                                                                                                                                                                                                                                                                                                |
| Neutropenia    | D70, D70.0-4, D70.8-9                                                                                                                                                                                                                                                                                                                                                                                                                                                                                                                           |
| Sepsis         | R65.20, R65.21, 670.20, 670.22, 670.24, 995.91, 995.92, A02.1, A22.7, A26.7, A32.7, A40, A40.0, A40.1, A40.3, A40.8, A40.9, A41-2, A54.86, B37.7, O03.37, O85, O86.04, P36                                                                                                                                                                                                                                                                                                                                                                      |
| Pyelonephritis | 590.0, 590.1, 590.10, 590.8, 590.80, 590.81, A02.25, D86.84, N10, N11.1                                                                                                                                                                                                                                                                                                                                                                                                                                                                         |

**Table S2.** Logical Observation Identifiers, Names and Codes (LOINC) Laboratory Codes

|               |                                                                                                        |
|---------------|--------------------------------------------------------------------------------------------------------|
| Platelets     | 26515-7, 777-3, 778-1, 5907-1, 74464-9, 79427-1, 97995-5                                               |
| Procalcitonin | 75241-0, 33959-8, LG15749-1                                                                            |
| WBC           | 58410-2, 26464-8, 6690-2, 804-551383-8, 12227-5, 33256-9, 26464-8, 30406-3, 57021-8, 57022-6, 57782-5, |

|            |                                                                                                                                                                                   |
|------------|-----------------------------------------------------------------------------------------------------------------------------------------------------------------------------------|
| Creatinine | 2160-0, 44784-7, 35203-9, 14682-9, 21232-4, 38483-4, 59826-8, 77140-2, 24362-6, 50261-7, 24320-4, 24321-2, 24322-0, 24323-8, 45064-3, 45065-0, 51990-0, 70219-1, 88843-8, 89044-2 |
| Albumin    | 1751-7, 61151-7, 61152-5, 54347-0, 62235-7, 62234-0, 76631-1, 77148-5, 24322-0, 24323-8, 45065-0, 89044-2                                                                         |
| Lactate    | 2524-7, 32693-4, 51829-0, 30242-2, 2519-7, 30241-4, 14118-4, 19239-3, 19240-1, 2518-9, 2519-7, 32132-3, 32133-1, 35245-0, 59032-3,                                                |

**Table S3.** Prediction Models

|                       |                                                                                                                                                                                                                                                                                                                                                                                                  |
|-----------------------|--------------------------------------------------------------------------------------------------------------------------------------------------------------------------------------------------------------------------------------------------------------------------------------------------------------------------------------------------------------------------------------------------|
| PCT+predictors model  | -2.693935592 (Intercept) + 0.001342232*AGE + 0.016094408*PCT + 0.083899681*diabetes + 0.230911834*liver_disease - 0.088039088*malignancy -0.265200533* COPD + 0.03776216*renal_disease + 0.082137661*CHF + 1.003462724*Admit_pyelo + 0.154997402*Admit_FN + 1.954755840*Admit_sepsis + 0.054753876*Abnormal_scr + 0.260894165*Abnormal_alb + 0.520389720*Abnormal_plt + 0.108123071*Abnormal_WBC |
| Predictors only model | -2.6465545788 (Intercept) + 0.0005363365*AGE + 0.0615012849*diabetes + 0.1856434769*liver_disease - 0.0929392763*malignancy - 0.2810399153*COPD + 0.0123805899*renal_disease + 0.0708894530*CHF + 1.0333367679*Admit_pyelo + 0.1375249469*Admit_FN + 2.0675191862*Admit_sepsis + 0.2489875526*Abnormal_scr + 0.3187883713*Abnormal_alb + 0.5844923683*Abnormal_plt + 0.1158177503*Abnormal_WBC   |

**Figure S1.** Calibration of bacteremia model with clinical characteristics and lab results excluding PCT

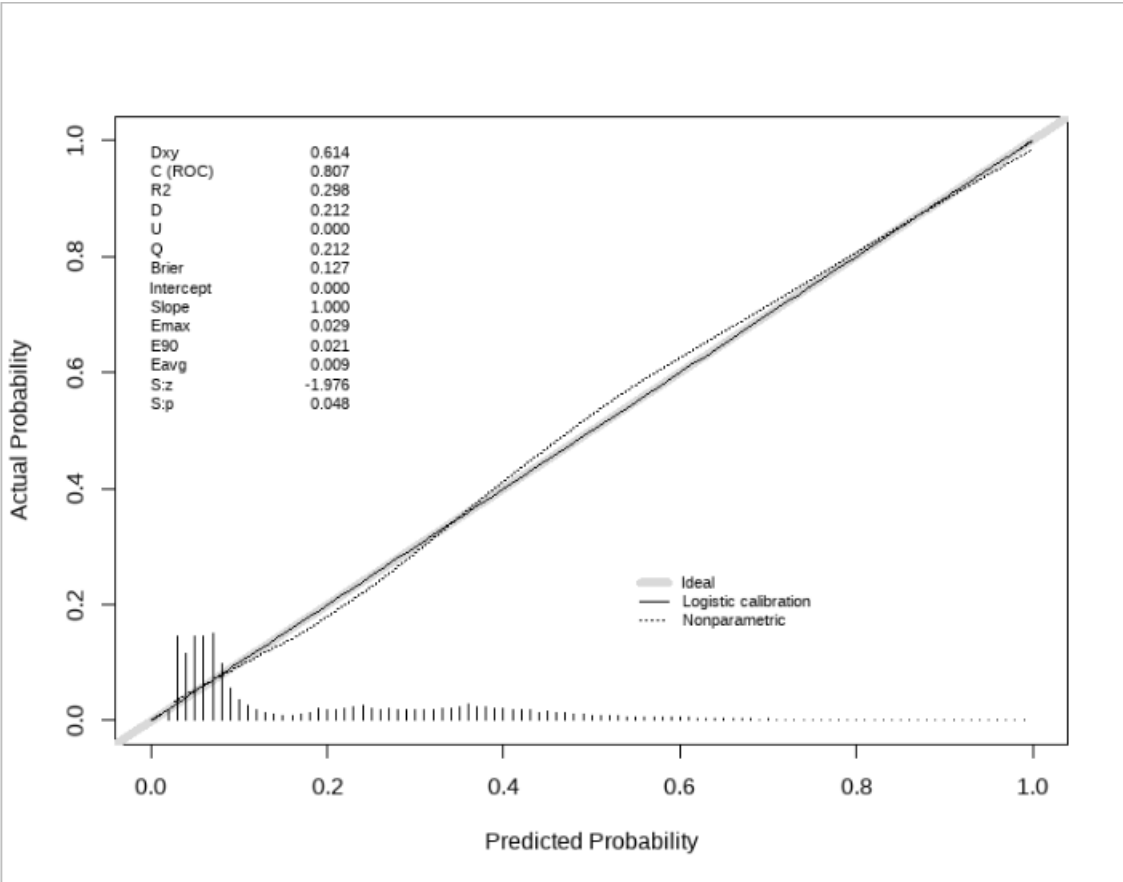

**Figure S2.** Calibration of bacteremia model with clinical characteristics and lab results including PCT

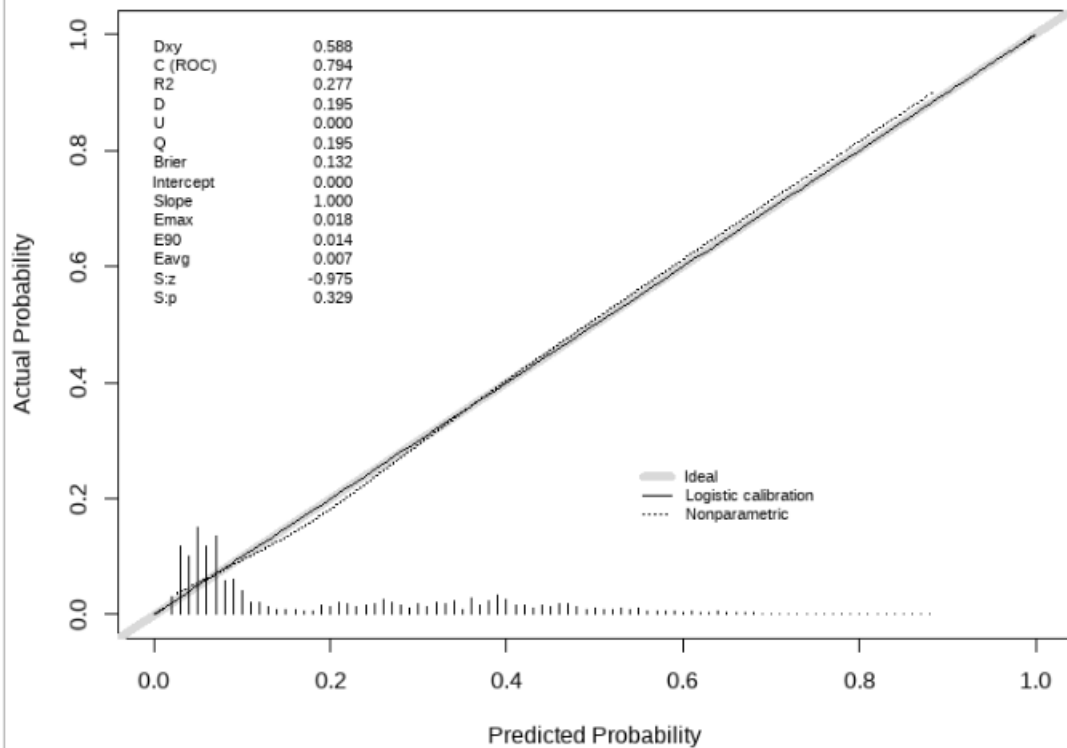

**Table S4. Decision making on advanced diagnostic testing using direct specimens**

| PCT Level (ng/dL) | PCT only | Predicted Risk without PCT |              |             | Predicted Risk with PCT |              |             |
|-------------------|----------|----------------------------|--------------|-------------|-------------------------|--------------|-------------|
|                   |          | Low (<25%)                 | Med (25-75%) | High (>75%) | Low (<25%)              | Med (25-75%) | High (>75%) |
| <0.5              | No       | -                          | -            | -           | No                      | No           | Yes         |
| 0.5< to <2        | No       | -                          | -            | -           | No                      | No           | Yes         |
| >2 to <10         | No       | -                          | -            | -           | No                      | Yes          | Yes         |
| >10               | Yes      | -                          | -            | -           | No                      | Yes          | Yes         |
| Overall           | -        | No                         | No           | Yes         | -                       | -            | -           |
